# Supplementary material for: DNA methylation status is more reliable than gene expression at detecting cancer in prostate biopsy
Source: PubMed Central journal article supplement — Br J Cancer. 2014 Jun 17;111(4):781–9. doi: 10.1038/bjc.2014.337 (PMC4134497; doi:10.1038/bjc.2014.337), 2014-06-17

**Supplementary material for "DNA methylation status is more reliable than gene expression at detecting cancer in prostate biopsy"**

Agnieszka Paziewska <sup>1</sup>, Michalina Dabrowska <sup>2</sup>, Krzysztof Goryca <sup>2</sup>, Artur Antoniewicz <sup>3</sup>, Jakub Dobruch <sup>4</sup>, Michal Mikula <sup>2</sup>, Dorota Jarosz <sup>1,2</sup>, Lukasz Zapala <sup>3</sup>, Andrzej Borowka <sup>4</sup>, Jerzy Ostrowski <sup>1,2,\*</sup>

<sup>1</sup>Department of Gastroenterology and Hepatology, Medical Center for Postgraduate Education, 01-813 Warsaw, Poland

<sup>2</sup> Department of Genetics, Maria Sklodowska-Curie Memorial Cancer Center and Institute of Oncology; 02-781 Warsaw, Poland

<sup>3</sup> Department of Urology, Multidisciplinary Hospital Warsaw-Miedzylesie, 04-749 Warsaw, Poland

<sup>4</sup>Department of Urology, Medical Center for Postgraduate Education, 01-813 Warsaw, Poland

**\* Corresponding author:**

Jerzy Ostrowski, Cancer Center-Institute, Roentgena 5, 02-781 Warsaw, Poland,

Tel: +48 22 5462575, Fax: +48 22 5462449, E-mail: [jostrow@warman.com.pl](mailto:jostrow@warman.com.pl)

**Supplementary Table S1. Expression changes of genes selected for methylation-based classifier observed on microarrays.** Fold change (FC) and adjusted *p*-values are given for comparison of combined cancerous and non-cancerous samples from cancer bearing prostates with BPH. DGKZ and mir10B probes were filtered-out in data preparation steps so the adjusted *p*-values are unavailable.

| <b>Gene name</b>                                                   | <b>Gene symbols</b> | <b>Adjusted <i>p</i>-value</b> | <b>FC</b>   |
|--------------------------------------------------------------------|---------------------|--------------------------------|-------------|
| hairy and enhancer of split 5 (Drosophila)                         | HES5                | 0.344967386                    | 0.94        |
| integrin, beta 2 (complement component 3 receptor 3 and 4 subunit) | ITGB2               | 0.363337043                    | 0.69        |
| integrin, beta 2 (complement component 3 receptor 3 and 4 subunit) | ITGB2               | 0.404614672                    | 0.71        |
| retinoic acid receptor, beta                                       | RARB                | 0.926476998                    | 1.01        |
| <b>retinoic acid receptor, beta</b>                                | <b>RARB</b>         | <b>0.00372112</b>              | <b>0.78</b> |
| retinoic acid receptor, beta                                       | RARB                | 0.176002584                    | 0.93        |
| transforming, acidic coiled-coil containing protein 2              | TACC2               | 0.016793631                    | 1.31        |
| transforming, acidic coiled-coil containing protein 2              | TACC2               | 0.021926906                    | 1.27        |
|                                                                    |                     |                                |             |
| gene name                                                          | gene symbols        | <i>p</i> -value (not adjusted) | FC          |
| diacylglycerol kinase, zeta                                        | DGKZ                | 0.240383004                    | 1.09        |
| diacylglycerol kinase, zeta                                        | DGKZ                | 0.593016866                    | 1.01        |
| diacylglycerol kinase, zeta                                        | DGKZ                | 0.304895273                    | 1.03        |
| microRNA 10b                                                       | MIR10B              | 0.240383004                    | 1.05        |

## **Titles and legends to supplementary figures**

**Supplementary Figure S1. qRT-PCR validation of genes with the highest magnitude of changes between BPH and PCa by microarray profiling.** Relative mRNA levels were measured in RNA extracted from 19 BPH samples, 20 cancerous prostate samples with low dysplastic cell content (< 10%), 22 cancerous prostate samples with high dysplastic cell content (30-90%), and 27 adjacent non-cancerous prostate samples. Geometric mean expression of UBC and RPLP0 was used for normalization. The horizontal line is the median. Statistical significance was assessed by the Mann-Whitney test.  $p$ -values < 0.05 were considered significant (\*). (\*\*)  $p$ -value < 0.001; (\*\*\*)  $p$ -value < 0.0001.

**Supplementary Figure S2. Gene expression measurement in core biopsies by qRT-PCR.** RNA was isolated from core biopsies taken from 131, 59 and 37 patients with histologically diagnosed PCa, BPH, and high-grade PIN, respectively. The horizontal line is the median. Statistical significance was assessed by the Mann-Whitney test.  $p$ -values < 0.05 were considered significant (\*). (\*\*)  $p$ -value < 0.001; (\*\*\*)  $p$ -value < 0.0001.

**Supplementary Figure S3. MS-qPCR validation of differentially methylated regions between BPH and PCa.** DNA (1  $\mu$ g) extracted from 14 BPH samples, 15 cancerous prostate samples with low dysplastic cell content (< 10%), 15 cancerous prostate samples with high dysplastic cell content (30-90%), and 26 adjacent non-cancerous prostate samples was bisulfite-converted and subjected to MS-qPCR. Results are expressed as percentages of the methylation level of fully methylated DNA from an EpiTect PCR Control DNA Set normalized to input DNA. The horizontal line is the median. Statistical significance was assessed by the Mann-Whitney test.  $p$ -values < 0.05 were considered significant (\*). (\*\*)  $p$ -value < 0.001; (\*\*\*)  $p$ -value < 0.0001.

**Supplementary Figure S4. Validation of differentially methylated regions in core biopsies by MS-qPCR.** DNA (1  $\mu$ g) was isolated from core biopsies taken from 131, 59 and 37 patients with histologically diagnosed PCa, BPH, and high-grade PIN, respectively. The horizontal line is the median. Statistical significance was assessed by the Mann-Whitney test.  $p$ -values < 0.05 were considered significant (\*). (\*\*)  $p$ -value < 0.001; (\*\*\*)  $p$ -value < 0.0001.

Figure S1

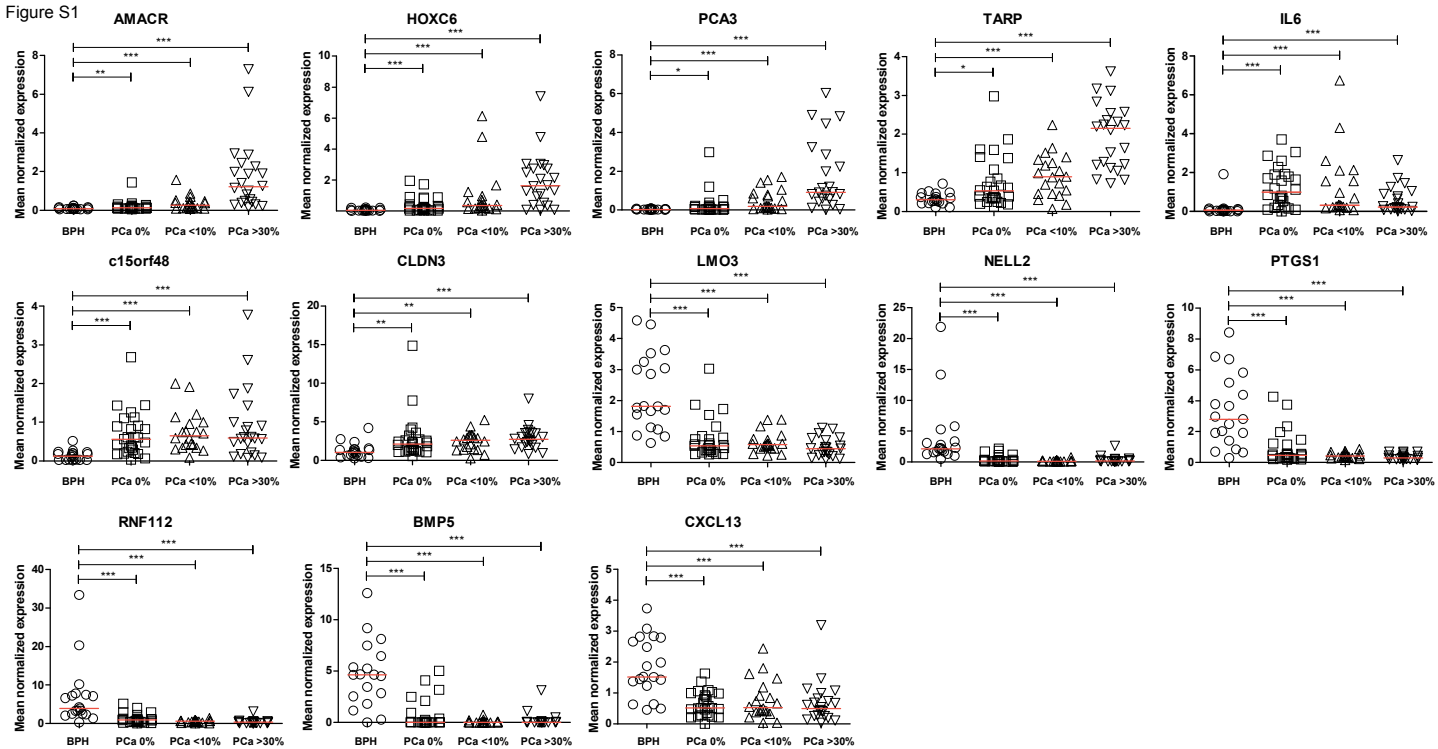

Figure S2

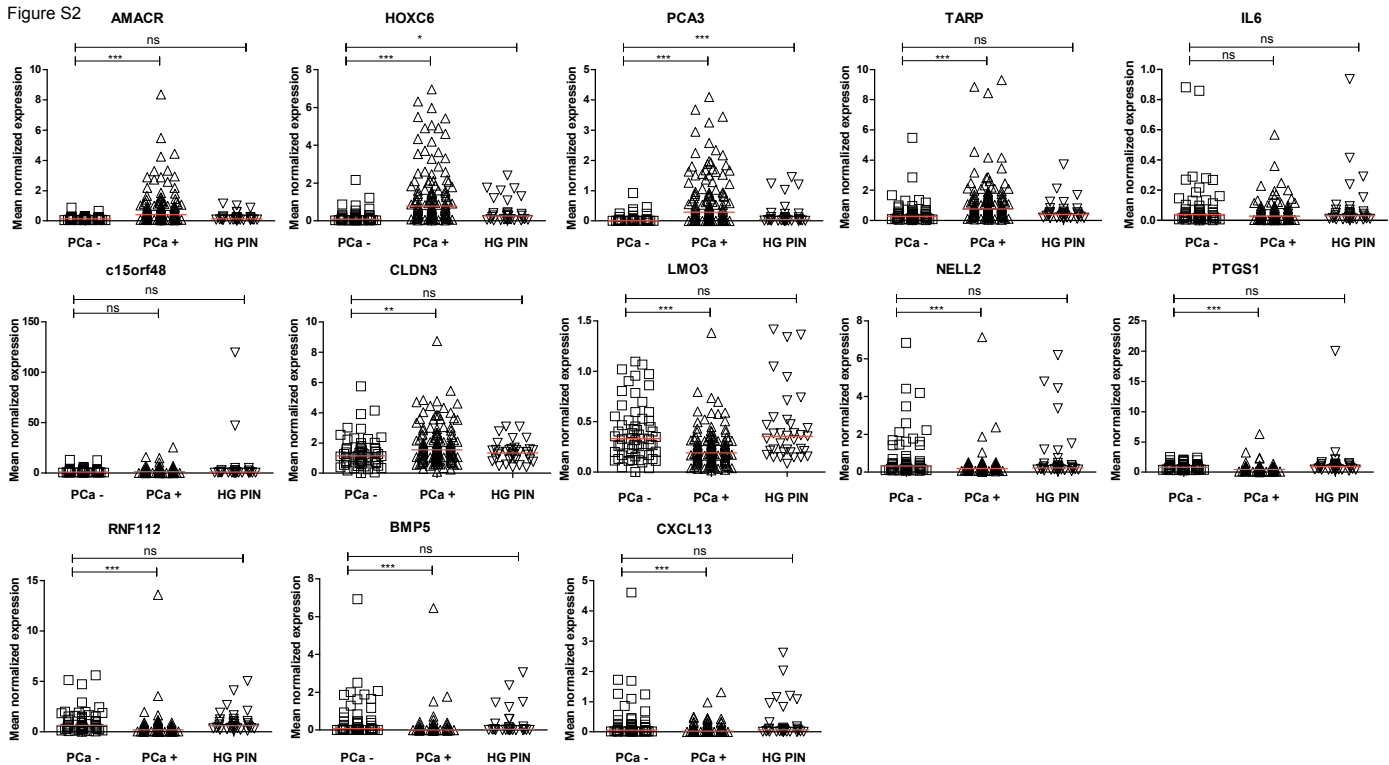

Figure S3

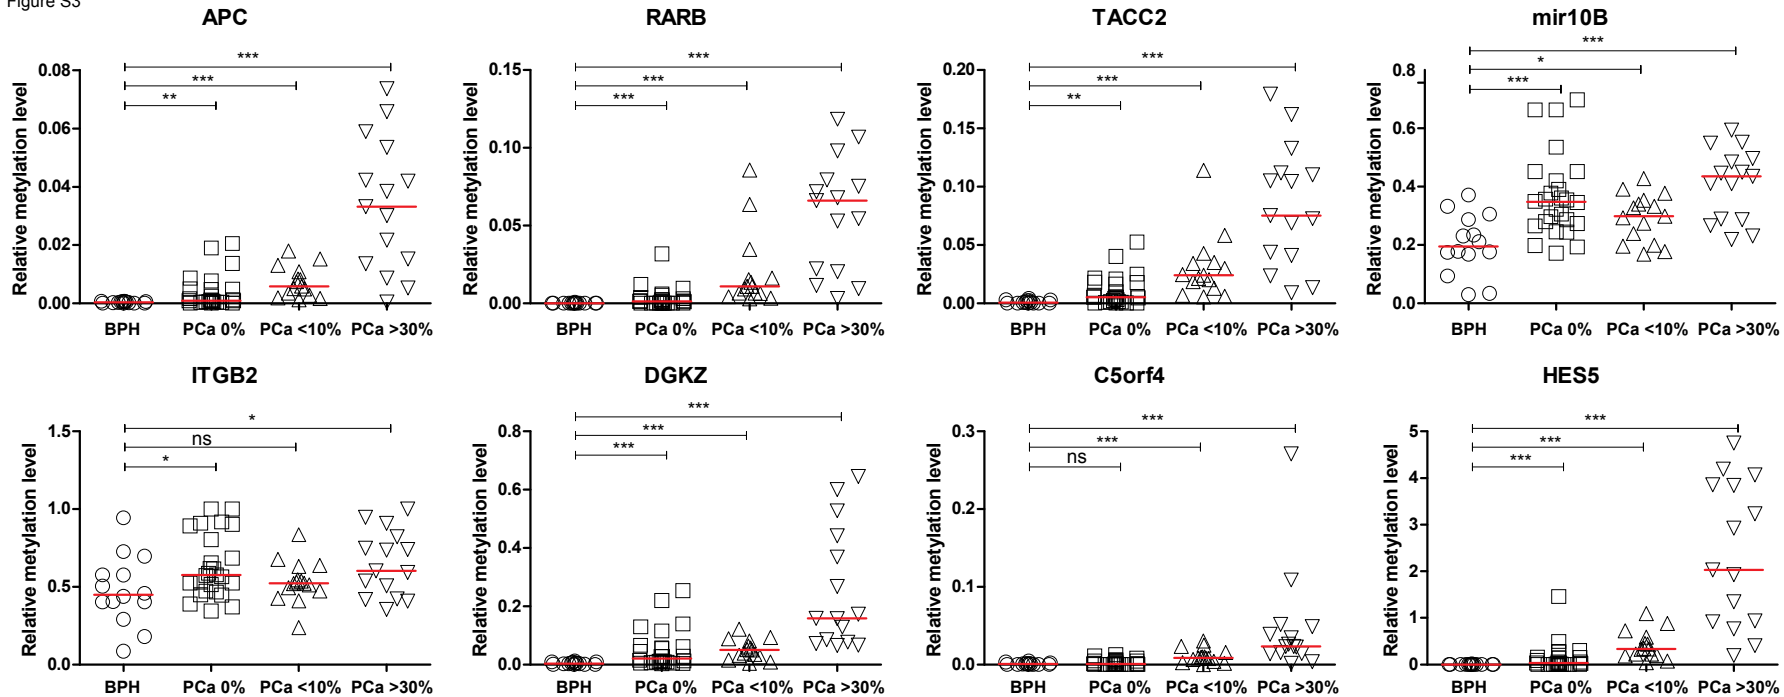

Figure S4

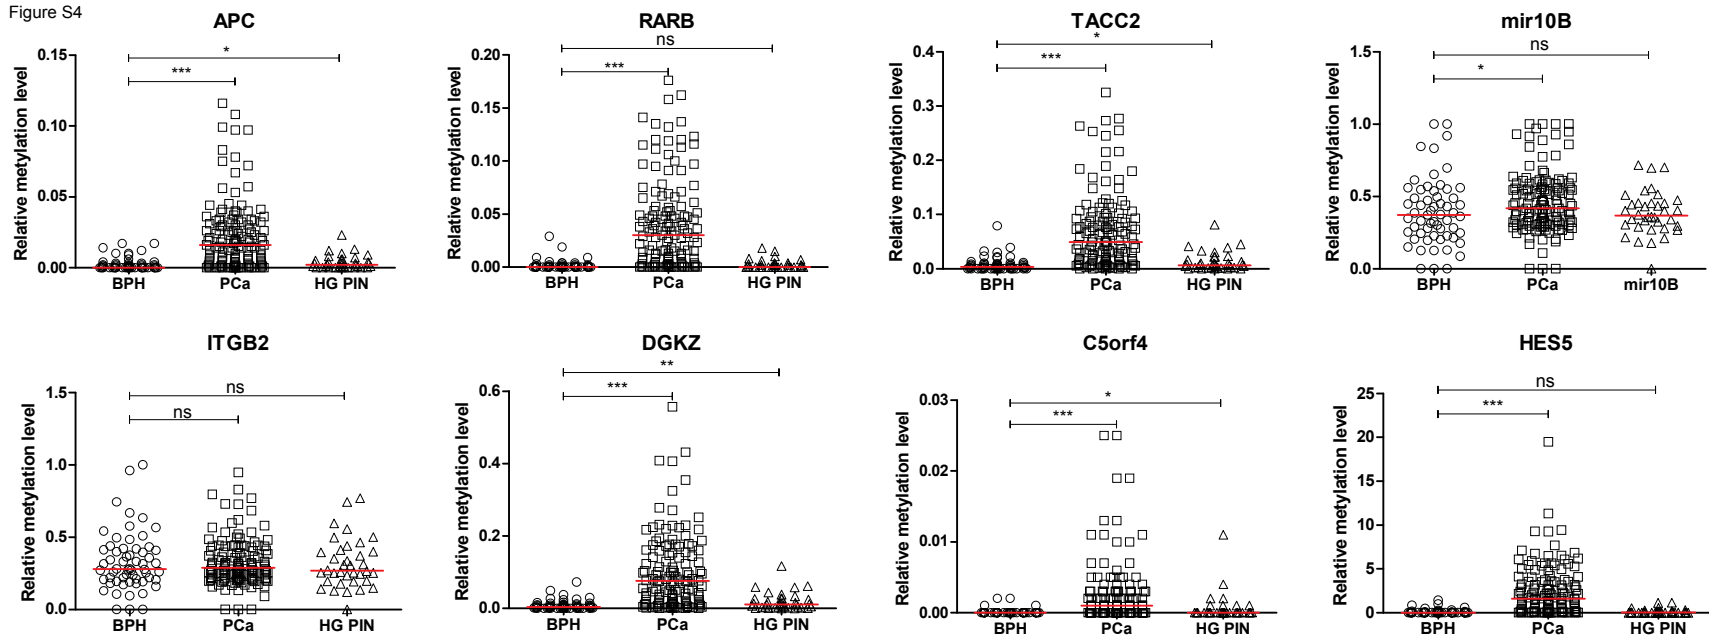

Supplement: bjc2014337x1.pdf [file bjc2014337x1.pdf]
